# Supplementary material
Source: MDPI journal article supplement (https://www.mdpi.com/2071-1050/15/1/206)

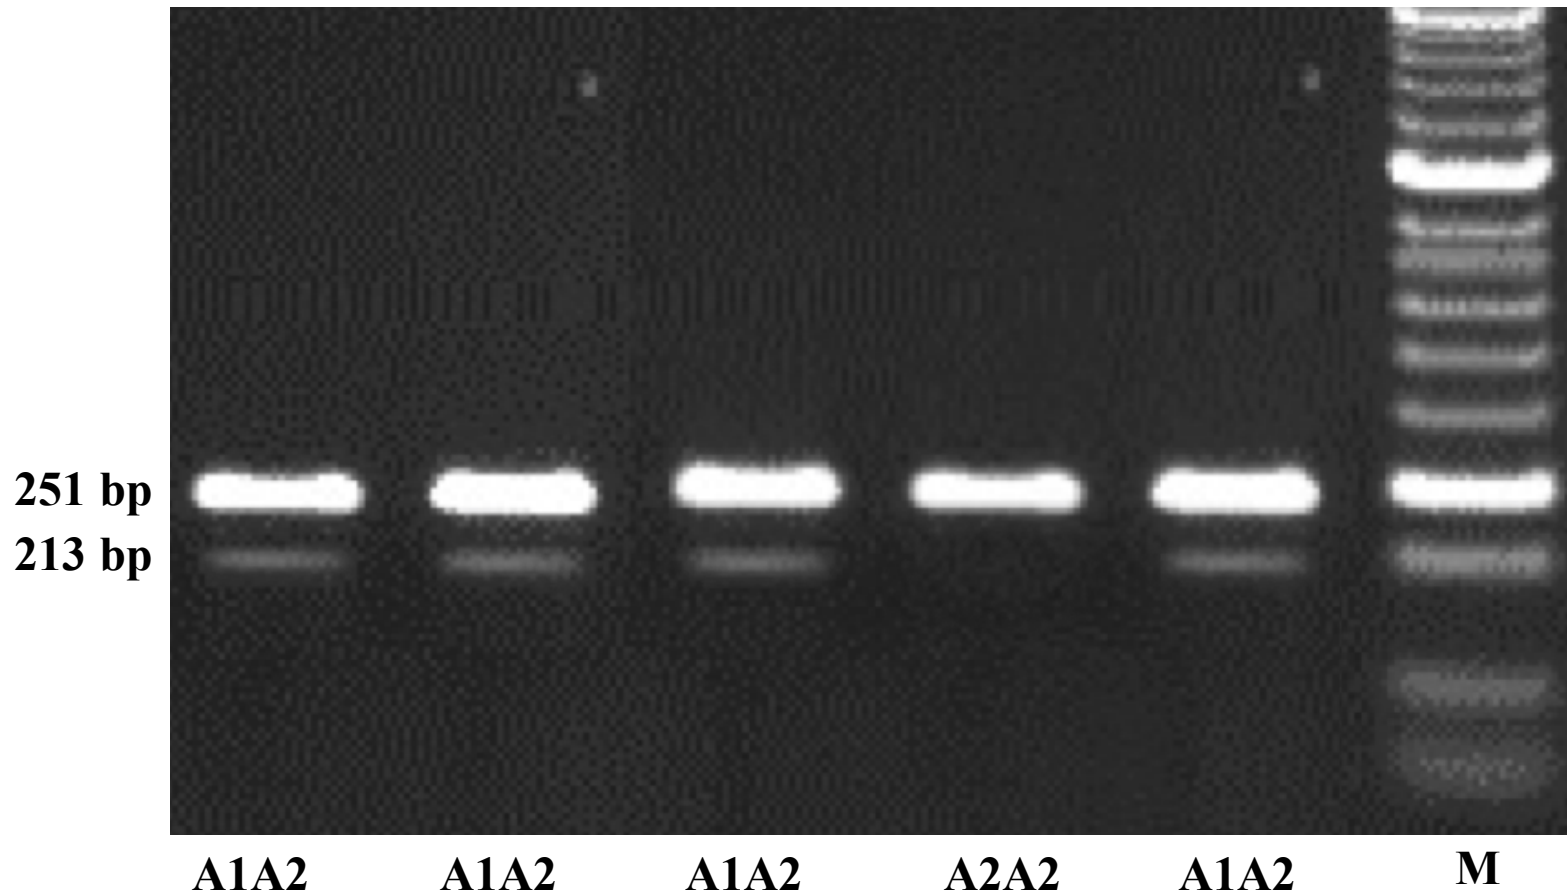

Figure S1: Genotypes of beta-casein in the samples (3.5% agarose gel)

M: 100 bp DNA ladder.

Supplement: s1 [file s1]
